# Supplementary material for: A new set of indicators for model evaluation complementing to FAIRMODE’s MQO
Source: Copernicus journal article supplement (doi:10.5194/egusphere-2024-3690), 2025-01-03
Supplement: Supplementary file 1 [file egusphere-2024-3690-supplement.pdf]

## Supplement material

5 **Table S1 Overview statistics for the calculated air quality model indicators for NO<sub>2</sub> for different countries: (a) Spain, (b) France, (c) Germany, (d) Poland and (e) Italy. Indicators are: MQI Hourly/Daily (MQI<sub>HD</sub>), Temporal Bias (TN), Temporal correlation coefficient (TN 1-R), Temporal Standard deviation (TNstdev), Yearly Urban-Traffic vs Urban-Background (Year UT-UB), Yearly Urban-Background vs Rural-Background (Year UB-RB) for Traffic, Industry, Background (T, I, B), difference in bias between Winter – Summer (W-S), Week – Weekend (W-We), Day – Night (DN), Spatial correlation coefficient (SN 1-R), Spatial standard deviation (SNstdev), MQI Year (MQI<sub>YR</sub>). All statistical parameters are normalized by the measurement uncertainty (N).**

| NO <sub>2</sub> | MQI <sub>HD</sub> | MQI <sub>YR</sub> | TN<br>(Bias) | TN(1-<br>R) | TN<br>(Stdev) | T(W-<br>S) | T(Wk-<br>We) | T(D-<br>N) | B(W-<br>S) | B(Wk-<br>We) | B(D-<br>N) | I(W-<br>S) | I(Wk-<br>We) | I(D-<br>N) | SN(1-<br>R) | SN<br>(Stdev) | UT-<br>UB | UB-<br>RB |
|-----------------|-------------------|-------------------|--------------|-------------|---------------|------------|--------------|------------|------------|--------------|------------|------------|--------------|------------|-------------|---------------|-----------|-----------|
| <b>ES</b>       |                   |                   |              |             |               |            |              |            |            |              |            |            |              |            |             |               |           |           |
| CHla            | 0.51              | 0.93              | 0.30         | 0.13        | 0.27          | 0.81       | 0.54         | 0.80       | 0.60       | 0.29         | 0.41       | 0.70       | 0.29         | 0.49       | 0.24        | 0.32          | 1.39      | 1.12      |
| DEHMa           | 0.70              | 1.66              | 0.50         | 0.16        | 0.40          | 1.06       | 0.95         | 0.82       | 0.79       | 0.58         | 0.40       | 0.77       | 0.55         | 0.66       | 0.25        | 0.40          | 1.21      | 1.24      |
| EMPa            | 0.59              | 1.20              | 0.36         | 0.15        | 0.32          | 0.84       | 0.64         | 0.87       | 0.63       | 0.35         | 0.44       | 0.63       | 0.33         | 0.54       | 0.35        | 0.21          | 1.31      | 1.20      |
| ENSKCa          | 0.59              | 1.33              | 0.41         | 0.10        | 0.35          | 0.90       | 0.66         | 0.89       | 0.61       | 0.36         | 0.41       | 0.65       | 0.38         | 0.51       | 0.32        | 0.22          | 1.29      | 1.06      |
| FMla            | 0.57              | 1.20              | 0.37         | 0.15        | 0.29          | 0.77       | 0.60         | 0.88       | 0.64       | 0.29         | 0.51       | 0.67       | 0.30         | 0.44       | 0.38        | 0.17          | 1.35      | 1.09      |
| GEMAQa          | 0.64              | 1.37              | 0.43         | 0.18        | 0.29          | 0.86       | 0.59         | 1.06       | 0.76       | 0.29         | 0.65       | 0.76       | 0.36         | 0.97       | 0.48        | 0.09          | 1.32      | 1.02      |
| KNMa            | 0.65              | 1.44              | 0.44         | 0.16        | 0.32          | 0.87       | 0.67         | 0.93       | 0.66       | 0.33         | 0.41       | 0.64       | 0.38         | 0.55       | 0.27        | 0.27          | 1.29      | 1.06      |
| MFMa            | 0.66              | 1.52              | 0.46         | 0.15        | 0.35          | 0.96       | 0.67         | 0.85       | 0.58       | 0.39         | 0.44       | 0.88       | 0.40         | 0.65       | 0.84        | 0.05          | 1.46      | 1.13      |
| RIUa            | 0.66              | 1.62              | 0.50         | 0.14        | 0.38          | 1.15       | 0.78         | 0.86       | 0.72       | 0.47         | 0.41       | 0.68       | 0.51         | 0.55       | 0.31        | 0.26          | 1.27      | 1.09      |
| <b>FR</b>       |                   |                   |              |             |               |            |              |            |            |              |            |            |              |            |             |               |           |           |
| CHla            | 0.63              | 1.58              | 0.46         | 0.12        | 0.29          | 0.83       | 0.56         | 1.45       | 0.49       | 0.19         | 0.41       | 0.40       | 0.16         | 0.26       | 0.30        | 0.71          | 1.93      | 1.19      |
| DEHMa           | 0.82              | 2.22              | 0.63         | 0.16        | 0.39          | 1.11       | 0.81         | 1.57       | 0.77       | 0.45         | 0.35       | 0.33       | 0.41         | 0.27       | 0.51        | 0.62          | 1.91      | 1.73      |
| EMPa            | 0.73              | 1.95              | 0.54         | 0.13        | 0.35          | 0.86       | 0.63         | 1.60       | 0.52       | 0.24         | 0.42       | 0.37       | 0.22         | 0.30       | 0.46        | 0.60          | 1.99      | 1.41      |
| ENSKCa          | 0.74              | 1.97              | 0.57         | 0.11        | 0.35          | 0.85       | 0.65         | 1.57       | 0.58       | 0.26         | 0.44       | 0.32       | 0.24         | 0.28       | 0.44        | 0.58          | 1.96      | 1.36      |
| FMla            | 0.69              | 1.78              | 0.50         | 0.13        | 0.30          | 0.84       | 0.59         | 1.52       | 0.51       | 0.20         | 0.33       | 0.35       | 0.16         | 0.30       | 0.46        | 0.55          | 1.96      | 1.15      |
| GEMAQa          | 0.74              | 2.04              | 0.57         | 0.16        | 0.29          | 1.00       | 0.63         | 1.61       | 0.58       | 0.24         | 0.49       | 0.39       | 0.20         | 0.43       | 0.49        | 0.53          | 1.96      | 1.60      |
| KNMa            | 0.75              | 2.05              | 0.58         | 0.15        | 0.31          | 0.86       | 0.60         | 1.64       | 0.63       | 0.26         | 0.47       | 0.27       | 0.13         | 0.32       | 0.45        | 0.56          | 1.97      | 1.38      |
| MFMa            | 0.74              | 1.98              | 0.58         | 0.14        | 0.35          | 0.91       | 0.70         | 1.64       | 0.58       | 0.32         | 0.51       | 0.40       | 0.35         | 0.36       | 0.59        | 0.47          | 1.96      | 1.23      |
| RIUa            | 0.81              | 2.24              | 0.63         | 0.14        | 0.37          | 1.12       | 0.77         | 1.65       | 0.77       | 0.37         | 0.48       | 0.22       | 0.33         | 0.39       | 0.50        | 0.56          | 1.95      | 1.45      |
| <b>DE</b>       |                   |                   |              |             |               |            |              |            |            |              |            |            |              |            |             |               |           |           |
| CHla            | 0.62              | 1.69              | 0.48         | 0.10        | 0.26          | 0.73       | 0.73         | 1.20       | 0.45       | 0.22         | 0.34       | 0.34       | 0.22         | 0.24       | 0.32        | 0.60          | 1.80      | 1.42      |
| DEHMa           | 0.73              | 2.00              | 0.58         | 0.16        | 0.29          | 0.69       | 0.91         | 1.24       | 0.50       | 0.41         | 0.33       | 0.35       | 0.48         | 0.22       | 0.42        | 0.56          | 1.71      | 1.44      |
| EMPa            | 0.68              | 1.84              | 0.54         | 0.12        | 0.27          | 0.73       | 0.79         | 1.23       | 0.50       | 0.26         | 0.29       | 0.49       | 0.25         | 0.26       | 0.41        | 0.53          | 1.82      | 1.39      |
| ENSKCa          | 0.68              | 1.86              | 0.53         | 0.12        | 0.27          | 0.77       | 0.80         | 1.26       | 0.45       | 0.30         | 0.29       | 0.38       | 0.33         | 0.20       | 0.41        | 0.51          | 1.82      | 1.24      |
| FMla            | 0.66              | 1.77              | 0.51         | 0.13        | 0.24          | 0.76       | 0.77         | 1.23       | 0.44       | 0.22         | 0.31       | 0.36       | 0.26         | 0.28       | 0.48        | 0.45          | 1.86      | 1.21      |
| GEMAQa          | 0.69              | 1.82              | 0.53         | 0.18        | 0.21          | 0.90       | 0.82         | 1.44       | 0.53       | 0.29         | 0.39       | 0.45       | 0.33         | 0.39       | 0.46        | 0.46          | 1.84      | 1.17      |
| KNMa            | 0.69              | 1.94              | 0.55         | 0.16        | 0.23          | 0.78       | 0.74         | 1.42       | 0.53       | 0.25         | 0.35       | 0.48       | 0.31         | 0.30       | 0.45        | 0.48          | 1.80      | 1.25      |
| MFMa            | 0.69              | 1.92              | 0.54         | 0.18        | 0.27          | 1.02       | 0.82         | 1.30       | 0.55       | 0.36         | 0.36       | 1.41       | 0.53         | 0.86       | 1.26        | 0.03          | 2.08      | 1.37      |
| RIUa            | 0.71              | 1.91              | 0.55         | 0.17        | 0.24          | 0.73       | 0.85         | 1.34       | 0.45       | 0.37         | 0.36       | 0.35       | 0.44         | 0.26       | 0.45        | 0.47          | 1.75      | 1.16      |
| <b>IT</b>       |                   |                   |              |             |               |            |              |            |            |              |            |            |              |            |             |               |           |           |
| CHla            | 0.63              | 1.46              | 0.42         | 0.17        | 0.31          | 1.13       | 0.47         | 1.25       | 1.11       | 0.26         | 0.58       | 0.85       | 0.32         | 0.48       | 0.36        | 0.59          | 1.90      | 1.83      |
| DEHMa           | 0.87              | 2.50              | 0.71         | 0.16        | 0.45          | 1.42       | 0.86         | 1.45       | 1.38       | 0.58         | 0.77       | 0.89       | 0.68         | 0.58       | 0.60        | 0.47          | 1.92      | 2.16      |
| EMPa            | 0.77              | 2.09              | 0.57         | 0.24        | 0.40          | 1.41       | 0.59         | 1.37       | 1.63       | 0.39         | 0.65       | 1.18       | 0.52         | 0.51       | 0.82        | 0.19          | 2.05      | 1.98      |
| ENSKCa          | 0.82              | 2.29              | 0.64         | 0.14        | 0.42          | 1.28       | 0.70         | 1.48       | 1.20       | 0.41         | 0.75       | 0.71       | 0.53         | 0.61       | 0.63        | 0.37          | 1.97      | 1.92      |
| FMla            | 0.76              | 2.01              | 0.57         | 0.18        | 0.37          | 1.21       | 0.63         | 1.49       | 1.27       | 0.32         | 0.71       | 0.97       | 0.45         | 0.51       | 0.74        | 0.21          | 2.03      | 1.73      |
| GEMAQa          | 0.80              | 2.11              | 0.60         | 0.34        | 0.38          | 1.91       | 0.61         | 2.04       | 2.03       | 0.34         | 1.17       | 1.67       | 0.39         | 1.13       | 0.93        | 0.10          | 2.10      | 1.93      |
| KNMa            | 0.84              | 2.43              | 0.69         | 0.17        | 0.42          | 1.34       | 0.67         | 1.59       | 1.33       | 0.39         | 0.77       | 0.89       | 0.55         | 0.64       | 0.57        | 0.43          | 1.88      | 1.81      |
| MFMa            | 0.83              | 2.27              | 0.64         | 0.22        | 0.41          | 1.62       | 0.76         | 1.35       | 1.41       | 0.50         | 0.71       | 0.86       | 0.56         | 0.62       | 0.72        | 0.36          | 1.88      | 1.93      |
| RIUa            | 0.89              | 2.62              | 0.73         | 0.20        | 0.45          | 1.62       | 0.76         | 1.40       | 1.58       | 0.48         | 0.77       | 1.29       | 0.61         | 0.64       | 0.64        | 0.41          | 1.87      | 1.86      |
| <b>PL</b>       |                   |                   |              |             |               |            |              |            |            |              |            |            |              |            |             |               |           |           |
| CHla            | 0.60              | 1.38              | 0.42         | 0.18        | 0.27          | 1.49       | 0.67         | 1.24       | 0.54       | 0.24         | 0.37       | 0.28       | 0.30         | 0.19       | 0.30        | 0.67          | 2.40      | 1.07      |
| DEHMa           | 0.76              | 2.06              | 0.59         | 0.14        | 0.35          | 1.10       | 1.05         | 1.30       | 0.85       | 0.63         | 0.45       | 0.40       | 0.70         | 0.21       | 0.24        | 0.81          | 2.33      | 1.17      |
| EMPa            | 0.74              | 1.89              | 0.55         | 0.17        | 0.30          | 1.63       | 0.88         | 1.32       | 0.54       | 0.53         | 0.35       | 0.22       | 0.55         | 0.32       | 0.35        | 0.67          | 2.37      | 1.22      |
| ENSKCa          | 0.72              | 1.93              | 0.56         | 0.13        | 0.29          | 1.50       | 0.87         | 1.32       | 0.57       | 0.47         | 0.36       | 0.11       | 0.52         | 0.30       | 0.32        | 0.67          | 2.38      | 1.14      |
| FMla            | 0.69              | 1.81              | 0.53         | 0.18        | 0.24          | 1.84       | 0.80         | 1.23       | 0.55       | 0.39         | 0.39       | 0.48       | 0.45         | 0.27       | 0.39        | 0.61          | 2.40      | 1.08      |
| GEMAQa          | 0.76              | 1.94              | 0.56         | 0.28        | 0.19          | 1.83       | 0.88         | 1.54       | 0.71       | 0.41         | 0.40       | 0.66       | 0.49         | 0.57       | 0.36        | 0.63          | 2.33      | 1.10      |
| KNMa            | 0.76              | 2.06              | 0.60         | 0.18        | 0.27          | 0.88       | 0.79         | 1.32       | 0.78       | 0.37         | 0.32       | 0.67       | 0.45         | 0.43       | 0.36        | 0.59          | 2.39      | 1.06      |
| MFMa            | 0.70              | 1.64              | 0.45         | 0.32        | 0.23          | 2.23       | 0.86         | 1.35       | 0.97       | 0.51         | 0.40       | 0.81       | 0.51         | 0.51       | 1.00        | 0.16          | 3.76      | 1.28      |
| RIUa            | 0.76              | 2.10              | 0.61         | 0.17        | 0.28          | 1.29       | 0.92         | 1.36       | 0.50       | 0.51         | 0.34       | 0.09       | 0.54         | 0.24       | 0.27        | 0.73          | 2.35      | 1.22      |

**Table S2. Similar to NO2, but for O3.**

| <b>O3</b> | MQI HD | MQI YR | TN(Bias) | TN(1-R) | TN (Stdev) | T(W-S) | T(Wk-We) | B(W-S) | B(Wk-We) | I(W-S) | I(Wk-We) | SN(1-R) | SN (Stdev) | UT-UB | UB-RB |
|-----------|--------|--------|----------|---------|------------|--------|----------|--------|----------|--------|----------|---------|------------|-------|-------|
| <b>ES</b> |        |        |          |         |            |        |          |        |          |        |          |         |            |       |       |
| CH1a      | 0.52   | 0.50   | 0.36     | 0.14    | 0.18       | 0.57   | 0.17     | 0.49   | 0.11     | 0.55   | 0.10     | 0.06    | 0.16       | 0.45  | 0.52  |
| DEHMa     | 0.71   | 0.75   | 0.54     | 0.19    | 0.29       | 0.92   | 0.23     | 0.95   | 0.14     | 0.80   | 0.12     | 0.08    | 0.20       | 0.48  | 0.67  |
| EMPa      | 0.60   | 0.60   | 0.44     | 0.19    | 0.17       | 0.76   | 0.21     | 0.51   | 0.11     | 0.62   | 0.10     | 0.10    | 0.10       | 0.56  | 0.59  |
| ENSKCa    | 0.56   | 0.54   | 0.39     | 0.14    | 0.24       | 0.74   | 0.20     | 0.62   | 0.09     | 0.59   | 0.09     | 0.07    | 0.17       | 0.53  | 0.56  |
| FM1a      | 0.58   | 0.60   | 0.45     | 0.17    | 0.16       | 0.62   | 0.18     | 0.61   | 0.10     | 0.56   | 0.09     | 0.09    | 0.10       | 0.58  | 0.74  |
| GEMAQa    | 0.91   | 0.76   | 0.55     | 0.34    | 0.33       | 1.38   | 0.26     | 1.35   | 0.12     | 1.39   | 0.15     | 0.11    | 0.10       | 0.66  | 0.57  |
| KNMa      | 0.71   | 0.74   | 0.53     | 0.19    | 0.25       | 0.84   | 0.22     | 0.77   | 0.13     | 0.77   | 0.12     | 0.10    | 0.16       | 0.56  | 0.66  |
| MFMa      | 0.58   | 0.60   | 0.44     | 0.17    | 0.21       | 0.80   | 0.21     | 0.63   | 0.10     | 0.57   | 0.11     | 0.10    | 0.10       | 0.54  | 0.76  |
| RIUa      | 0.93   | 0.87   | 0.63     | 0.47    | 0.25       | 0.98   | 0.23     | 0.91   | 0.12     | 0.81   | 0.12     | 0.15    | 0.21       | 0.55  | 0.55  |
| <b>FR</b> |        |        |          |         |            |        |          |        |          |        |          |         |            |       |       |
| CH1a      | 0.34   | 0.25   | 0.18     | 0.08    | 0.10       | 0.26   | 0.05     | 0.33   | 0.07     | 0.15   | 0.06     | 0.03    | 0.07       | ---   | 0.47  |
| DEHMa     | 0.50   | 0.49   | 0.35     | 0.13    | 0.22       | 0.45   | 0.06     | 0.63   | 0.10     | 0.71   | 0.10     | 0.04    | 0.06       | ---   | 0.60  |
| EMPa      | 0.39   | 0.29   | 0.22     | 0.09    | 0.11       | 0.33   | 0.02     | 0.44   | 0.07     | 0.26   | 0.03     | 0.05    | 0.01       | ---   | 0.54  |
| ENSKCa    | 0.32   | 0.28   | 0.20     | 0.06    | 0.13       | 0.27   | 0.04     | 0.37   | 0.05     | 0.22   | 0.04     | 0.03    | 0.06       | ---   | 0.51  |
| FM1a      | 0.36   | 0.30   | 0.21     | 0.08    | 0.09       | 0.17   | 0.06     | 0.35   | 0.07     | 0.21   | 0.02     | 0.04    | 0.01       | ---   | 0.38  |
| GEMAQa    | 0.57   | 0.54   | 0.38     | 0.16    | 0.15       | 0.30   | 0.01     | 0.63   | 0.08     | 0.45   | 0.05     | 0.05    | 0.03       | ---   | 0.61  |
| KNMa      | 0.46   | 0.45   | 0.33     | 0.12    | 0.20       | 0.27   | 0.01     | 0.57   | 0.08     | 0.34   | 0.06     | 0.04    | 0.03       | ---   | 0.48  |
| MFMa      | 0.37   | 0.32   | 0.23     | 0.10    | 0.13       | 0.38   | 0.06     | 0.48   | 0.07     | 0.31   | 0.04     | 0.04    | 0.02       | ---   | 0.43  |
| RIUa      | 0.66   | 0.46   | 0.33     | 0.28    | 0.16       | 0.00   | 0.01     | 0.66   | 0.14     | 0.30   | 0.13     | 0.09    | 0.01       | ---   | 0.68  |
| <b>DE</b> |        |        |          |         |            |        |          |        |          |        |          |         |            |       |       |
| CH1a      | 0.46   | 0.52   | 0.36     | 0.10    | 0.11       | 0.68   | 0.26     | 0.33   | 0.09     | 0.42   | 0.04     | 0.04    | 0.20       | 0.79  | 0.64  |
| DEHMa     | 0.61   | 0.64   | 0.44     | 0.16    | 0.20       | 0.56   | 0.26     | 0.67   | 0.11     | 0.78   | 0.04     | 0.06    | 0.18       | 0.88  | 0.66  |
| EMPa      | 0.54   | 0.51   | 0.38     | 0.13    | 0.11       | 0.58   | 0.23     | 0.37   | 0.12     | 0.36   | 0.05     | 0.06    | 0.16       | 0.90  | 0.63  |
| ENSKCa    | 0.46   | 0.50   | 0.37     | 0.09    | 0.13       | 0.59   | 0.26     | 0.36   | 0.11     | 0.40   | 0.04     | 0.04    | 0.19       | 0.78  | 0.62  |
| FM1a      | 0.48   | 0.51   | 0.36     | 0.11    | 0.11       | 0.61   | 0.25     | 0.34   | 0.09     | 0.39   | 0.04     | 0.06    | 0.13       | 0.82  | 0.57  |
| GEMAQa    | 0.64   | 0.67   | 0.45     | 0.20    | 0.13       | 0.45   | 0.32     | 0.45   | 0.14     | 0.43   | 0.09     | 0.05    | 0.17       | 0.79  | 0.69  |
| KNMa      | 0.59   | 0.61   | 0.43     | 0.15    | 0.20       | 0.45   | 0.23     | 0.57   | 0.11     | 0.68   | 0.08     | 0.05    | 0.17       | 0.83  | 0.61  |
| MFMa      | 0.52   | 0.53   | 0.36     | 0.10    | 0.16       | 0.52   | 0.25     | 0.44   | 0.10     | 0.43   | 0.06     | 0.06    | 0.16       | 0.61  | 0.61  |
| RIUa      | 0.71   | 0.64   | 0.44     | 0.31    | 0.18       | 1.08   | 0.28     | 0.87   | 0.17     | 0.70   | 0.10     | 0.08    | 0.10       | 0.79  | 0.64  |
| <b>IT</b> |        |        |          |         |            |        |          |        |          |        |          |         |            |       |       |
| CH1a      | 0.82   | 0.96   | 0.70     | 0.19    | 0.26       | 0.83   | 0.22     | 1.01   | 0.14     | 0.57   | 0.15     | 0.29    | 0.16       | 0.66  | 1.20  |
| DEHMa     | 0.83   | 0.85   | 0.60     | 0.22    | 0.40       | 0.83   | 0.24     | 1.65   | 0.16     | 0.84   | 0.08     | 0.14    | 0.28       | 0.71  | 1.27  |
| EMPa      | 0.97   | 1.10   | 0.77     | 0.31    | 0.25       | 0.72   | 0.21     | 0.95   | 0.16     | 0.42   | 0.20     | 0.32    | 0.11       | 0.79  | 1.37  |
| ENSKCa    | 0.75   | 0.80   | 0.59     | 0.15    | 0.31       | 0.77   | 0.25     | 1.18   | 0.16     | 0.49   | 0.09     | 0.17    | 0.24       | 0.69  | 1.15  |
| FM1a      | 0.99   | 1.13   | 0.78     | 0.26    | 0.30       | 1.08   | 0.20     | 1.08   | 0.15     | 0.77   | 0.14     | 0.41    | 0.03       | 0.87  | 1.35  |
| GEMAQa    | 0.99   | 0.99   | 0.66     | 0.29    | 0.34       | 1.16   | 0.30     | 1.63   | 0.19     | 0.87   | 0.13     | 0.12    | 0.26       | 0.83  | 1.26  |
| KNMa      | 0.94   | 1.13   | 0.79     | 0.29    | 0.43       | 0.85   | 0.31     | 1.72   | 0.22     | 0.96   | 0.16     | 0.16    | 0.21       | 0.79  | 1.33  |
| MFMa      | 0.83   | 0.83   | 0.59     | 0.27    | 0.33       | 0.93   | 0.28     | 1.24   | 0.16     | 0.56   | 0.14     | 0.23    | 0.15       | 0.63  | 1.33  |
| RIUa      | 1.11   | 0.97   | 0.69     | 0.50    | 0.41       | 0.76   | 0.32     | 1.80   | 0.20     | 0.77   | 0.13     | 0.14    | 0.21       | 0.88  | 0.99  |
| <b>PL</b> |        |        |          |         |            |        |          |        |          |        |          |         |            |       |       |
| CH1a      | 0.38   | 0.27   | 0.19     | 0.10    | 0.11       | 0.36   | 0.01     | 0.44   | 0.09     | 0.31   | 0.09     | 0.02    | 0.07       | 0.24  | 0.37  |
| DEHMa     | 0.46   | 0.35   | 0.25     | 0.15    | 0.22       | 0.00   | 0.05     | 0.97   | 0.11     | 0.88   | 0.12     | 0.02    | 0.08       | 0.25  | 0.37  |
| EMPa      | 0.40   | 0.29   | 0.21     | 0.15    | 0.11       | 0.46   | 0.04     | 0.57   | 0.11     | 0.41   | 0.12     | 0.02    | 0.05       | 0.29  | 0.40  |
| ENSKCa    | 0.37   | 0.26   | 0.18     | 0.11    | 0.14       | 0.33   | 0.04     | 0.51   | 0.09     | 0.40   | 0.12     | 0.01    | 0.08       | 0.24  | 0.37  |
| FM1a      | 0.39   | 0.27   | 0.19     | 0.12    | 0.12       | 0.40   | 0.05     | 0.55   | 0.09     | 0.30   | 0.14     | 0.03    | 0.01       | 0.36  | 0.49  |
| GEMAQa    | 0.59   | 0.48   | 0.33     | 0.22    | 0.11       | 0.20   | 0.12     | 0.57   | 0.16     | 0.34   | 0.19     | 0.02    | 0.04       | 0.23  | 0.41  |
| KNMa      | 0.52   | 0.42   | 0.29     | 0.16    | 0.21       | 0.09   | 0.03     | 0.75   | 0.08     | 0.56   | 0.13     | 0.03    | 0.02       | 0.21  | 0.30  |
| MFMa      | 0.46   | 0.29   | 0.20     | 0.16    | 0.15       | 0.26   | 0.06     | 0.57   | 0.12     | 0.43   | 0.12     | 0.03    | 0.06       | 0.15  | 0.34  |
| RIUa      | 0.65   | 0.20   | 0.14     | 0.37    | 0.16       | 1.09   | 0.02     | 1.05   | 0.11     | 0.23   | 0.18     | 0.02    | 0.05       | 0.23  | 0.40  |

**Table S3. Similar to NO2, but for PM2.5**

| <b>PM25</b> | MQI HD | MQI YR | TN(Bias) | TN(1-R) | TN (Stdev) | T(W-S) | T(Wk-We) | B(W-S) | B(Wk-We) | I(W-S) | I(Wk-We) | SN(1-R) | SN (Stdev) | UT-UB | UB-RB |
|-------------|--------|--------|----------|---------|------------|--------|----------|--------|----------|--------|----------|---------|------------|-------|-------|
| <b>ES</b>   |        |        |          |         |            |        |          |        |          |        |          |         |            |       |       |
| CH1a        | 0.45   | 0.58   | 0.34     | 0.10    | 0.18       | 0.57   | 0.16     | 0.70   | 0.13     | 0.62   | 0.10     | 0.07    | 0.19       | 0.77  | 0.46  |
| DEHMa       | 0.51   | 0.54   | 0.32     | 0.12    | 0.23       | 0.77   | 0.17     | 0.51   | 0.11     | 0.57   | 0.07     | 0.07    | 0.21       | 0.65  | 0.51  |
| EMPa        | 0.67   | 0.61   | 0.36     | 0.17    | 0.34       | 0.75   | 0.14     | 0.82   | 0.15     | 0.89   | 0.13     | 0.13    | 0.10       | 0.75  | 0.43  |
| ENSKCa      | 0.45   | 0.53   | 0.30     | 0.10    | 0.19       | 0.59   | 0.12     | 0.44   | 0.10     | 0.57   | 0.08     | 0.09    | 0.17       | 0.70  | 0.42  |
| FM1a        | 0.54   | 0.64   | 0.37     | 0.13    | 0.21       | 0.49   | 0.18     | 0.40   | 0.15     | 0.65   | 0.11     | 0.13    | 0.08       | 0.75  | 0.40  |
| GEMAQa      | 0.60   | 0.64   | 0.38     | 0.20    | 0.28       | 0.66   | 0.18     | 0.67   | 0.11     | 0.52   | 0.10     | 0.11    | 0.16       | 0.75  | 0.43  |
| KNMa        | 0.54   | 0.55   | 0.32     | 0.17    | 0.20       | 0.86   | 0.12     | 0.47   | 0.13     | 0.61   | 0.14     | 0.09    | 0.16       | 0.76  | 0.38  |
| MFMa        | 0.60   | 0.77   | 0.45     | 0.13    | 0.24       | 0.65   | 0.12     | 0.67   | 0.12     | 0.73   | 0.13     | 0.19    | 0.01       | 0.98  | 0.83  |
| RIUa        | 0.56   | 0.61   | 0.35     | 0.20    | 0.26       | 0.79   | 0.11     | 0.50   | 0.12     | 0.65   | 0.10     | 0.10    | 0.14       | 0.64  | 0.48  |
| <b>FR</b>   |        |        |          |         |            |        |          |        |          |        |          |         |            |       |       |
| CH1a        | 0.59   | 0.33   | 0.19     | 0.33    | 0.16       | 0.33   | 0.16     | 0.58   | 0.13     | 0.49   | 0.07     | 0.02    | 0.12       | 0.50  | 0.34  |
| DEHMa       | 0.57   | 0.39   | 0.24     | 0.30    | 0.21       | 0.56   | 0.16     | 0.95   | 0.11     | 0.92   | 0.12     | 0.06    | 0.05       | 0.56  | 0.38  |
| EMPa        | 0.61   | 0.33   | 0.19     | 0.35    | 0.13       | 0.51   | 0.15     | 0.66   | 0.14     | 0.68   | 0.06     | 0.04    | 0.08       | 0.41  | 0.35  |
| ENSKCa      | 0.59   | 0.36   | 0.21     | 0.30    | 0.17       | 0.49   | 0.16     | 0.88   | 0.13     | 0.76   | 0.09     | 0.04    | 0.08       | 0.51  | 0.35  |
| FM1a        | 0.61   | 0.39   | 0.23     | 0.36    | 0.14       | 0.43   | 0.15     | 0.71   | 0.12     | 0.64   | 0.11     | 0.04    | 0.10       | 0.48  | 0.40  |
| GEMAQa      | 0.67   | 0.41   | 0.25     | 0.41    | 0.15       | 0.42   | 0.14     | 0.75   | 0.11     | 0.74   | 0.11     | 0.07    | 0.04       | 0.55  | 0.45  |
| KNMa        | 0.61   | 0.38   | 0.23     | 0.33    | 0.16       | 0.78   | 0.19     | 1.11   | 0.16     | 1.16   | 0.14     | 0.04    | 0.06       | 0.54  | 0.31  |
| MFMa        | 0.60   | 0.42   | 0.24     | 0.34    | 0.21       | 0.51   | 0.16     | 0.79   | 0.16     | 0.73   | 0.11     | 0.06    | 0.00       | 0.61  | 0.47  |
| RIUa        | 0.71   | 0.47   | 0.27     | 0.46    | 0.19       | 0.55   | 0.21     | 1.00   | 0.19     | 1.07   | 0.15     | 0.09    | 0.02       | 0.58  | 0.43  |
| <b>DE</b>   |        |        |          |         |            |        |          |        |          |        |          |         |            |       |       |
| CH1a        | 0.28   | 0.33   | 0.19     | 0.05    | 0.13       | 0.32   | 0.08     | 0.28   | 0.09     | 0.28   | 0.07     | 0.03    | 0.09       | 0.32  | 0.40  |
| DEHMa       | 0.37   | 0.37   | 0.22     | 0.08    | 0.16       | 0.41   | 0.10     | 0.31   | 0.11     | 0.35   | 0.09     | 0.04    | 0.10       | 0.34  | 0.31  |
| EMPa        | 0.32   | 0.34   | 0.20     | 0.06    | 0.13       | 0.42   | 0.12     | 0.44   | 0.08     | 0.38   | 0.07     | 0.04    | 0.08       | 0.34  | 0.31  |
| ENSKCa      | 0.28   | 0.29   | 0.17     | 0.04    | 0.15       | 0.39   | 0.10     | 0.33   | 0.09     | 0.28   | 0.07     | 0.02    | 0.10       | 0.31  | 0.31  |
| FM1a        | 0.34   | 0.41   | 0.25     | 0.05    | 0.14       | 0.48   | 0.15     | 0.37   | 0.11     | 0.40   | 0.11     | 0.04    | 0.08       | 0.32  | 0.41  |
| GEMAQa      | 0.52   | 0.39   | 0.23     | 0.21    | 0.17       | 0.32   | 0.14     | 0.44   | 0.09     | 0.28   | 0.11     | 0.06    | 0.04       | 0.37  | 0.46  |
| KNMa        | 0.42   | 0.32   | 0.19     | 0.13    | 0.15       | 0.96   | 0.11     | 0.87   | 0.14     | 0.87   | 0.13     | 0.03    | 0.10       | 0.31  | 0.28  |
| MFMa        | 0.34   | 0.43   | 0.25     | 0.06    | 0.12       | 0.40   | 0.15     | 0.35   | 0.13     | 0.27   | 0.15     | 0.05    | 0.01       | 0.31  | 0.53  |
| RIUa        | 0.56   | 0.55   | 0.32     | 0.21    | 0.21       | 0.52   | 0.18     | 0.43   | 0.22     | 0.42   | 0.17     | 0.04    | 0.05       | 0.39  | 0.32  |
| <b>IT</b>   |        |        |          |         |            |        |          |        |          |        |          |         |            |       |       |
| CH1a        | 0.82   | 0.57   | 0.34     | 0.60    | 0.24       | ---    | 0.31     | ---    | 0.23     | ---    | 0.31     | 0.09    | 0.25       | 0.09  | ---   |
| DEHMa       | 0.83   | 0.72   | 0.44     | 0.42    | 0.36       | ---    | 0.22     | ---    | 0.20     | ---    | 0.31     | 0.11    | 0.25       | 0.09  | ---   |
| EMPa        | 0.99   | 0.78   | 0.45     | 0.76    | 0.40       | ---    | 0.27     | ---    | 0.28     | ---    | 0.31     | 0.23    | 0.07       | 0.11  | ---   |
| ENSKCa      | 0.84   | 0.61   | 0.38     | 0.46    | 0.36       | ---    | 0.25     | ---    | 0.22     | ---    | 0.27     | 0.13    | 0.20       | 0.09  | ---   |
| FM1a        | 0.87   | 0.76   | 0.44     | 0.60    | 0.33       | ---    | 0.35     | ---    | 0.31     | ---    | 0.37     | 0.17    | 0.16       | 0.10  | ---   |
| GEMAQa      | 0.90   | 0.68   | 0.39     | 0.70    | 0.33       | ---    | 0.11     | ---    | 0.18     | ---    | 0.21     | 0.18    | 0.14       | 0.08  | ---   |
| KNMa        | 0.85   | 0.58   | 0.36     | 0.56    | 0.32       | ---    | 0.23     | ---    | 0.23     | ---    | 0.28     | 0.06    | 0.20       | 0.09  | ---   |
| MFMa        | 0.84   | 0.73   | 0.45     | 0.50    | 0.33       | ---    | 0.27     | ---    | 0.25     | ---    | 0.31     | 0.16    | 0.17       | 0.06  | ---   |
| RIUa        | 0.89   | 0.78   | 0.46     | 0.51    | 0.42       | ---    | 0.23     | ---    | 0.20     | ---    | 0.27     | 0.20    | 0.15       | 0.10  | ---   |
| <b>PL</b>   |        |        |          |         |            |        |          |        |          |        |          |         |            |       |       |
| CH1a        | 1.04   | 0.53   | 0.30     | 0.95    | 0.42       | 0.52   | 0.15     | 1.04   | 0.29     | ---    | 0.19     | 0.06    | 0.16       | 0.42  | 0.93  |
| DEHMa       | 1.06   | 0.99   | 0.58     | 0.44    | 0.69       | 1.02   | 0.12     | 1.62   | 0.22     | ---    | 0.03     | 0.05    | 0.20       | 0.25  | 0.64  |
| EMPa        | 1.03   | 0.66   | 0.38     | 0.83    | 0.51       | 0.43   | 0.22     | 1.24   | 0.27     | ---    | 0.19     | 0.08    | 0.12       | 0.32  | 0.77  |
| ENSKCa      | 1.04   | 0.72   | 0.42     | 0.75    | 0.57       | 0.33   | 0.19     | 1.43   | 0.29     | ---    | 0.20     | 0.07    | 0.14       | 0.30  | 0.71  |
| FM1a        | 1.06   | 0.60   | 0.35     | 0.99    | 0.45       | 0.40   | 0.17     | 1.35   | 0.36     | ---    | 0.20     | 0.08    | 0.14       | 0.34  | 0.77  |
| GEMAQa      | 1.12   | 0.66   | 0.38     | 1.13    | 0.43       | 0.46   | 0.17     | 1.05   | 0.24     | ---    | 0.06     | 0.10    | 0.06       | 0.29  | 0.88  |
| KNMa        | 1.09   | 0.88   | 0.54     | 0.82    | 0.62       | 0.59   | 0.25     | 2.13   | 0.31     | ---    | 0.33     | 0.11    | 0.07       | 0.33  | 0.74  |
| MFMa        | 1.04   | 0.68   | 0.38     | 0.85    | 0.54       | 0.46   | 0.24     | 1.37   | 0.31     | ---    | 0.35     | 0.12    | 0.04       | 0.37  | 1.03  |
| RIUa        | 1.07   | 0.85   | 0.50     | 0.75    | 0.57       | 0.88   | 0.21     | 1.53   | 0.34     | ---    | 0.19     | 0.08    | 0.15       | 0.22  | 0.68  |

**Table S4. Similar to NO2, but for PM10.**

| <b>PM10</b> | MQI HD | MQI YR | TN(Bias) | TN(1-R) | TN (Stdev) | T(W-S) | T(Wk-We) | B(W-S) | B(Wk-We) | I(W-S) | I(Wk-We) | SN(1-R) | SN (Stdev) | UT-UB | UB-RB |
|-------------|--------|--------|----------|---------|------------|--------|----------|--------|----------|--------|----------|---------|------------|-------|-------|
| <b>ES</b>   |        |        |          |         |            |        |          |        |          |        |          |         |            |       |       |
| CH1a        | 0.69   | 1.20   | 0.49     | 0.20    | 0.33       | 0.86   | 0.33     | 1.12   | 0.31     | 1.11   | 0.30     | 0.29    | 0.52       | 1.05  | 1.42  |
| DEHMa       | 0.82   | 1.31   | 0.54     | 0.34    | 0.29       | 1.09   | 0.40     | 1.21   | 0.28     | 1.13   | 0.35     | 0.40    | 0.40       | 1.03  | 1.61  |
| EMPa        | 0.90   | 1.21   | 0.51     | 0.47    | 0.47       | 1.26   | 0.42     | 1.40   | 0.27     | 1.24   | 0.43     | 0.63    | 0.12       | 1.00  | 1.11  |
| ENSKCa      | 0.71   | 1.28   | 0.53     | 0.20    | 0.33       | 0.94   | 0.40     | 1.29   | 0.26     | 1.25   | 0.39     | 0.36    | 0.43       | 0.96  | 1.20  |
| FM1a        | 0.74   | 1.10   | 0.46     | 0.32    | 0.31       | 1.07   | 0.45     | 1.40   | 0.33     | 1.18   | 0.41     | 0.43    | 0.28       | 0.99  | 1.15  |
| GEMAQa      | 0.95   | 1.77   | 0.74     | 0.34    | 0.38       | 1.08   | 0.55     | 1.71   | 0.42     | 1.68   | 0.46     | 0.48    | 0.45       | 0.96  | 1.24  |
| KNMa        | 1.41   | 1.35   | 0.56     | 0.97    | 0.97       | 1.62   | 0.41     | 1.57   | 0.39     | 2.15   | 0.43     | 0.72    | 0.20       | 1.22  | 1.52  |
| MFMa        | 1.06   | 2.04   | 0.82     | 0.26    | 0.60       | 1.15   | 0.47     | 1.73   | 0.38     | 1.60   | 0.39     | 0.73    | 0.26       | 1.16  | 1.52  |
| RIUa        | 0.93   | 1.81   | 0.75     | 0.31    | 0.37       | 1.04   | 0.50     | 1.32   | 0.31     | 1.34   | 0.38     | 0.40    | 0.48       | 0.87  | 1.22  |
| <b>FR</b>   |        |        |          |         |            |        |          |        |          |        |          |         |            |       |       |
| CH1a        | 0.52   | 0.90   | 0.39     | 0.14    | 0.18       | 0.73   | 0.44     | 0.77   | 0.22     | 0.97   | 0.32     | 0.13    | 0.42       | 1.18  | 1.39  |
| DEHMa       | 0.68   | 1.18   | 0.49     | 0.26    | 0.23       | 0.74   | 0.51     | 1.17   | 0.24     | 1.27   | 0.34     | 0.36    | 0.23       | 1.47  | 0.98  |
| EMPa        | 0.64   | 0.90   | 0.38     | 0.24    | 0.17       | 0.80   | 0.50     | 0.96   | 0.24     | 1.16   | 0.33     | 0.22    | 0.32       | 1.27  | 0.90  |
| ENSKCa      | 0.61   | 1.14   | 0.48     | 0.14    | 0.23       | 0.74   | 0.53     | 0.90   | 0.21     | 1.00   | 0.41     | 0.17    | 0.36       | 1.18  | 0.89  |
| FM1a        | 0.62   | 1.12   | 0.47     | 0.20    | 0.20       | 0.64   | 0.50     | 0.85   | 0.21     | 1.05   | 0.43     | 0.17    | 0.40       | 1.13  | 1.12  |
| GEMAQa      | 0.76   | 1.39   | 0.59     | 0.24    | 0.28       | 0.66   | 0.61     | 0.85   | 0.39     | 1.11   | 0.54     | 0.23    | 0.29       | 1.23  | 0.86  |
| KNMa        | 0.94   | 1.18   | 0.50     | 0.61    | 0.43       | 1.19   | 0.65     | 1.40   | 0.35     | 1.08   | 0.50     | 0.21    | 0.33       | 1.15  | 0.85  |
| MFMa        | 0.74   | 1.32   | 0.55     | 0.15    | 0.37       | 0.85   | 0.53     | 0.93   | 0.30     | 1.06   | 0.47     | 0.26    | 0.22       | 1.04  | 0.79  |
| RIUa        | 0.82   | 1.51   | 0.64     | 0.27    | 0.23       | 0.97   | 0.55     | 1.15   | 0.27     | 0.95   | 0.47     | 0.36    | 0.24       | 1.06  | 0.83  |
| <b>DE</b>   |        |        |          |         |            |        |          |        |          |        |          |         |            |       |       |
| CH1a        | 0.53   | 0.90   | 0.37     | 0.12    | 0.23       | 0.81   | 0.40     | 0.63   | 0.22     | 0.75   | 0.22     | 0.17    | 0.34       | 0.94  | 1.02  |
| DEHMa       | 0.69   | 1.27   | 0.52     | 0.18    | 0.26       | 0.62   | 0.49     | 0.86   | 0.20     | 0.69   | 0.25     | 0.20    | 0.26       | 1.06  | 1.14  |
| EMPa        | 0.57   | 0.89   | 0.38     | 0.17    | 0.22       | 0.85   | 0.42     | 0.59   | 0.24     | 0.52   | 0.33     | 0.26    | 0.22       | 1.10  | 1.26  |
| ENSKCa      | 0.53   | 0.94   | 0.38     | 0.10    | 0.27       | 0.74   | 0.46     | 0.49   | 0.19     | 0.55   | 0.26     | 0.15    | 0.31       | 0.90  | 0.92  |
| FM1a        | 0.58   | 1.05   | 0.44     | 0.11    | 0.27       | 0.86   | 0.49     | 0.63   | 0.20     | 0.53   | 0.34     | 0.20    | 0.32       | 0.96  | 1.05  |
| GEMAQa      | 0.68   | 1.09   | 0.46     | 0.25    | 0.29       | 0.59   | 0.54     | 0.83   | 0.28     | 0.81   | 0.34     | 0.22    | 0.24       | 0.84  | 1.04  |
| KNMa        | 0.65   | 0.96   | 0.39     | 0.25    | 0.24       | 1.04   | 0.39     | 0.65   | 0.20     | 0.55   | 0.25     | 0.16    | 0.28       | 0.92  | 0.80  |
| MFMa        | 0.63   | 1.10   | 0.46     | 0.12    | 0.34       | 0.84   | 0.55     | 0.52   | 0.19     | 0.51   | 0.33     | 0.20    | 0.26       | 0.89  | 0.99  |
| RIUa        | 0.63   | 0.85   | 0.35     | 0.31    | 0.19       | 0.64   | 0.36     | 0.58   | 0.24     | 0.52   | 0.18     | 0.18    | 0.26       | 0.90  | 0.92  |
| <b>IT</b>   |        |        |          |         |            |        |          |        |          |        |          |         |            |       |       |
| CH1a        | 0.68   | 0.91   | 0.38     | 0.28    | 0.26       | 1.15   | 0.24     | 2.04   | 0.28     | 1.29   | 0.43     | 0.23    | 0.36       | 0.48  | 1.17  |
| DEHMa       | 0.82   | 1.23   | 0.49     | 0.35    | 0.32       | 1.58   | 0.35     | 2.22   | 0.37     | 1.03   | 0.59     | 0.60    | 0.33       | 0.79  | 1.37  |
| EMPa        | 1.01   | 1.15   | 0.47     | 0.56    | 0.50       | 1.80   | 0.39     | 2.52   | 0.36     | 1.96   | 0.59     | 0.55    | 0.15       | 0.79  | 1.12  |
| ENSKCa      | 0.79   | 1.41   | 0.59     | 0.24    | 0.36       | 1.39   | 0.39     | 1.98   | 0.32     | 0.72   | 0.61     | 0.31    | 0.42       | 0.67  | 1.08  |
| FM1a        | 0.82   | 1.03   | 0.43     | 0.36    | 0.42       | 1.30   | 0.31     | 1.65   | 0.28     | 1.09   | 0.44     | 0.33    | 0.35       | 1.23  | 1.07  |
| GEMAQa      | 1.05   | 1.66   | 0.69     | 0.59    | 0.43       | 1.78   | 0.73     | 2.50   | 0.35     | 0.89   | 0.94     | 0.55    | 0.40       | 0.66  | 1.30  |
| KNMa        | 1.14   | 1.18   | 0.48     | 0.89    | 0.65       | 2.62   | 0.52     | 2.78   | 0.31     | 2.68   | 0.64     | 0.24    | 0.19       | 0.71  | 1.01  |
| MFMa        | 1.10   | 2.02   | 0.82     | 0.25    | 0.50       | 1.26   | 0.49     | 2.18   | 0.30     | 1.39   | 0.63     | 0.43    | 0.42       | 0.64  | 1.00  |
| RIUa        | 1.14   | 2.15   | 0.88     | 0.41    | 0.43       | 1.91   | 0.51     | 3.04   | 0.33     | 0.98   | 0.72     | 0.43    | 0.43       | 0.44  | 0.89  |
| <b>PL</b>   |        |        |          |         |            |        |          |        |          |        |          |         |            |       |       |
| CH1a        | 0.62   | 0.94   | 0.38     | 0.21    | 0.34       | 1.29   | 0.37     | 1.59   | 0.27     | 1.00   | 0.47     | 0.28    | 0.32       | 1.43  | 1.61  |
| DEHMa       | 0.74   | 1.01   | 0.41     | 0.30    | 0.45       | 1.74   | 0.53     | 2.30   | 0.30     | 1.22   | 0.75     | 0.28    | 0.35       | 1.33  | 1.68  |
| EMPa        | 0.75   | 1.08   | 0.44     | 0.29    | 0.36       | 1.27   | 0.44     | 1.82   | 0.27     | 0.75   | 0.58     | 0.45    | 0.22       | 1.40  | 2.59  |
| ENSKCa      | 0.77   | 1.32   | 0.53     | 0.19    | 0.46       | 1.69   | 0.50     | 2.10   | 0.27     | 1.09   | 0.70     | 0.30    | 0.27       | 1.32  | 1.37  |
| FM1a        | 0.68   | 1.15   | 0.45     | 0.24    | 0.35       | 1.42   | 0.46     | 1.67   | 0.26     | 1.15   | 0.59     | 0.29    | 0.29       | 1.34  | 1.57  |
| GEMAQa      | 0.88   | 1.47   | 0.60     | 0.31    | 0.45       | 1.29   | 0.55     | 1.76   | 0.35     | 0.84   | 0.79     | 0.42    | 0.12       | 1.25  | 1.29  |
| KNMa        | 1.10   | 1.99   | 0.80     | 0.36    | 0.58       | 2.62   | 0.49     | 2.98   | 0.31     | 2.27   | 0.71     | 0.33    | 0.26       | 1.19  | 1.03  |
| MFMa        | 0.87   | 1.57   | 0.65     | 0.19    | 0.53       | 1.74   | 0.57     | 2.09   | 0.37     | 1.22   | 0.77     | 0.36    | 0.20       | 1.26  | 1.50  |
| RIUa        | 1.09   | 1.95   | 0.79     | 0.36    | 0.59       | 2.27   | 0.51     | 3.05   | 0.35     | 1.95   | 0.74     | 0.37    | 0.28       | 1.07  | 1.18  |
