# Supplementary material for: A new set of indicators for model evaluation complementing to FAIRMODE’s MQO
Source: Copernicus journal article supplement (doi:10.5194/egusphere-2024-3690), 2025-01-03
Supplement: Supplementary file [file egusphere-2024-3690-AC1-supplement.pdf]

Ispra (Italy), 18 February 2025

Dear Chief Editor,

We have made available the source code and input data that was used to write this manuscript.

You can download the source code and data here:

<https://zenodo.org/records/14870503>

We hope that this is sufficient to continue the reviewing process of our manuscript “ A new set of indicators for model evaluation complementing to FAIRMODE’s MQO”.

On behalf of all co-authors

Your sincerely,

Alexander de Meij
